# Supplementary material for: Allosteric Communication Occurs via Networks of Tertiary and Quaternary Motions in Proteins
Source: PubMed Central journal article supplement (PMC2634971; doi:10.1371/journal.pcbi.1000293), 2009-02-20
Supplement: pcbi.1000293.s004.pdf [file pcbi.1000293.s004.pdf]

### lac repressor (A-eff to DNA-E)

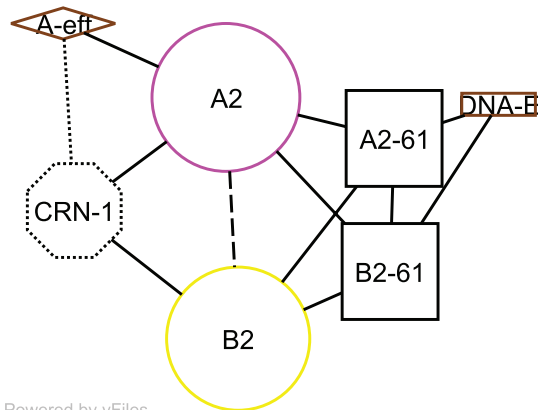

Powered by yFiles

### malic enzyme (A-eff to D-eff)

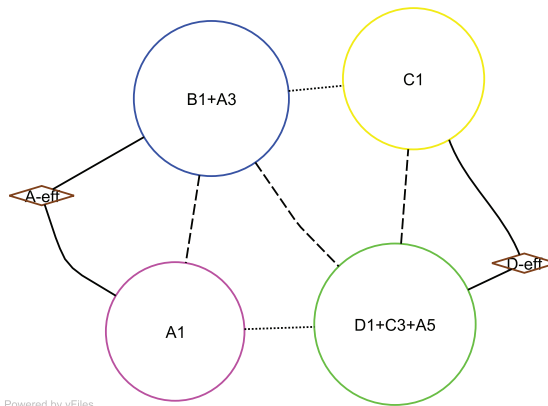

Powered by yFiles

### Figure S3: Proposed pathways in the GCNs of lac repressor and NAD-malic enzyme

The complete GCNs of these two proteins are shown in figure 4 of the main text, and pathways are calculated as in figure 5 of the main text. One path is shown per protein. A pathway connecting two effectors is shown for malic enzyme because there are no substrate-effector pathways in this protein.
