# Supplementary material for: Allosteric Communication Occurs via Networks of Tertiary and Quaternary Motions in Proteins
Source: PubMed Central journal article supplement (PMC2634971; doi:10.1371/journal.pcbi.1000293), 2009-02-20
Supplement: pcbi.1000293.s005.pdf [file pcbi.1000293.s005.pdf]

## Supplementary methods

### Center of rotation

It might seem intuitive to calculate the translation from  $|\mathbf{t}|$ , the displacement of  $c_S$ , the center of mass of S. However, except for translation parallel to  $\mathbf{u}$ ,  $\mathbf{t}$  may arise from rotation about a physically meaningful axis that does not pass through  $c_S$ . We define an axis as physically meaningful if this axis passes near the interface between L and S, that is, the residues that define the 6 Å contacts between L and S. We define an axis as passing near a set of residues if the  $C_\alpha$  atom of any residue in the set is no more than 5.0 Å from the axis. To assess this, we first find a center of rotation  $c_R$ , such that the motion can be described as a rotation by  $\theta$  about  $\mathbf{u}$ , centered at  $c_R$ , and a translation  $T_u$  parallel to  $\mathbf{u}$ .

To do this, we first find the basis vectors  $\mathbf{e}_x$ ,  $\mathbf{e}_y$ , and  $\mathbf{e}_z$  of a right-handed orthogonal coordinate system centered at  $c_R$  describing the counterclockwise motion from state A to state B. Let  $s_1$  and  $s_2$  be the centers of  $S_A$  and  $S'_B$ , and let  $\mathbf{s}$  be the vector between the two centers. Let  $\mathbf{e}_z = \mathbf{u}$ , and let  $\mathbf{e}_x$  lie in a plane defined by  $\mathbf{e}_z$  and the midpoint of  $\mathbf{s}$  such that  $s_1$  and  $s_2$  are in the  $(\mathbf{e}_x, -\mathbf{e}_y)$  and  $(\mathbf{e}_x, \mathbf{e}_y)$  quadrants, respectively. Then,  $\mathbf{e}_x = \text{unit}(\mathbf{s} \times \mathbf{e}_z)$ , where  $\text{unit}(\mathbf{v}) = \frac{\mathbf{v}}{|\mathbf{v}|}$ , and  $\mathbf{e}_y = \mathbf{e}_z \times \mathbf{x}$ .

Then, we find the distance of  $s_1$  from the origin in the  $\mathbf{e}_y$  and  $\mathbf{e}_x$  directions. Since  $\mathbf{e}_x$  lies in a plane bisecting  $\mathbf{s}$ ,  $s_1$  is  $y = \frac{1}{2}(\mathbf{s} \cdot \mathbf{e}_y)$  from the origin in the  $-\mathbf{e}_y$  direction. Next, we triangulate to find  $x$ , the distance of  $s_1$  from the origin in the  $\mathbf{e}_x$  direction:

$$x = \frac{y}{\tan\left(\frac{1}{2}\theta\right)}.$$

To find  $c_R$ , we simply extrapolate back:

$$c_R = s_1 - x\mathbf{e}_x + y\mathbf{e}_y.$$
