# Supplementary material for: Allosteric Communication Occurs via Networks of Tertiary and Quaternary Motions in Proteins
Source: PubMed Central journal article supplement (PMC2634971; doi:10.1371/journal.pcbi.1000293), 2009-02-20
Supplement: pcbi.1000293.s006.pdf [file pcbi.1000293.s006.pdf]

| protein name                 | % paths  |      |            |      |        |      |
|------------------------------|----------|------|------------|------|--------|------|
|                              | tertiary |      | quaternary |      | global |      |
|                              | homo     | het  | homo       | het  | homo   | het  |
| AraC                         | 0%       | -    | 0%         | -    | 0%     | -    |
| ArgR                         | 100%     | -    | 0%         | -    | 100%   | -    |
| MetR                         | 50%      | 0%   | 0%         | 0%   | 50%    | 0%   |
| TetR                         | 0%       | 0%   | 100%       | 100% | 100%   | 100% |
| anthranilate synthase        | 29%      | 50%  | 29%        | 50%  | 100%   | 100% |
| ATP sulfurylase              | 0%       | 0%   | 33%        | 0%   | 100%   | 100% |
| ATP-PRT                      | 30%      | 0%   | 50%        | 0%   | 100%   | 100% |
| ATCase                       | 25%      | 0%   | 0%         | 0%   | 25%    | 0%   |
| caspase                      | 100%     | -    | 0%         | -    | 100%   | -    |
| chorismate mutase            | 0%       | 0%   | 100%       | 100% | 100%   | 100% |
| DAHPh synthase               | 50%      | 25%  | 50%        | 25%  | 100%   | 100% |
| FBPase-1                     | 100%     | 100% | 0%         | 0%   | 100%   | 100% |
| GTP cyclohydrolase I         | 100%     | 100% | 40%        | 15%  | 100%   | 100% |
| glcN-6-P deaminase           | 20%      | 0%   | 50%        | 0%   | 100%   | 100% |
| glycogen phosphorylase       | 50%      | 0%   | 50%        | 50%  | 100%   | 100% |
| hemoglobin                   | 33%      | -    | 0%         | -    | 100%   | -    |
| lactate DH                   | 100%     | 100% | 50%        | 0%   | 100%   | 100% |
| NAD-malic enzyme             | 17%      | 0%   | 50%        | 0%   | 50%    | 0%   |
| phosphofructokinase          | 0%       | 25%  | 50%        | 25%  | 100%   | 100% |
| phosphoglycerate DH          | 8%       | 0%   | 100%       | 100% | 100%   | 100% |
| PTP1B                        | -        | 0%   | -          | 0%   | -      | 100% |
| uracil PRT                   | 100%     | 100% | 50%        | 0%   | 100%   | 100% |
| hits ( $\geq 20\%$ of paths) | 70%      | 39%  | 70%        | 39%  | 96%    | 83%  |
| hits (all paths)             | 26%      | 22%  | 22%        | 17%  | 83%    | 83%  |

**Table S1:** Homotropic and heterotropic connectivity in 22 proteins

“Tertiary network” refers to the contact rearrangement network and “quaternary network” refers to the quaternary subgraph of the global communication network ( $GCN_Q$ ). “Homo” refers to substrate-substrate and effector-effector paths, and “hetero” refers to substrate-effector paths.
