# Supplementary material for: Allosteric Communication Occurs via Networks of Tertiary and Quaternary Motions in Proteins
Source: PubMed Central journal article supplement (PMC2634971; doi:10.1371/journal.pcbi.1000293), 2009-02-20
Supplement: pcbi.1000293.s007.pdf [file pcbi.1000293.s007.pdf]

| <u>protein</u>        | <u><math>rms_{\text{net}}</math><br/>cutoff</u> |
|-----------------------|-------------------------------------------------|
| DAHP synthase         | 0.5                                             |
| hemoglobin            | 0.5                                             |
| phosphofructokinase   | 0.5                                             |
| PurR                  | 1.0                                             |
| anthranilate synthase | 1.0                                             |
| ATP sulfurylase       | 1.0                                             |
| ATP-PRT               | 1.0                                             |

**Table S2:** Proteins with  $rms_{\text{net}}$  cutoffs other than 0.8 Å
